# Supplementary material for: The Influence of Graphene Oxide-Fe3O4 Differently Conjugated with 10-Hydroxycampthotecin and a Rotating Magnetic Field on Adenocarcinoma Cells
Source: MDPI journal article supplement (doi:10.3390/ijms25020930), 2024-01-11
Supplement: s1 [file s1]

### ***Supporting Information***

#### **The influence of graphene oxide – Fe<sub>3</sub>O<sub>4</sub> differently conjugated with 10-hydroxycamptothecin and rotating magnetic field on adenocarcinoma cells**

Magdalena Jedrzejczak-Silicka<sup>1\*†</sup>, Karolina Szymańska<sup>2†</sup>, Ewa Mijowska<sup>2</sup>, Rafał Rakoczy<sup>3\*</sup>

<sup>1</sup>Laboratory of Cytogenetics, West Pomeranian University of Technology, Szczecin, Klemensa Janickiego 29, 71-270 Szczecin Poland

<sup>2</sup>Department of Physicochemistry of Nanomaterials, Faculty of Chemical Technology and Engineering, West Pomeranian University of Technology, Szczecin, Piastow Ave. 42, 71-065 Szczecin, Poland

<sup>3</sup>Institute of Chemical Engineering and Environmental Protection Process, West Pomeranian University of Technology, Szczecin, Piastow Avenue 42, 71-065 Szczecin, Poland

#### **\*Corresponding authors:**

1. Magdalena Jedrzejczak-Silicka, Email: [mjedrzejczak@zut.edu.pl](mailto:mjedrzejczak@zut.edu.pl)

Laboratory of Cytogenetics, Faculty of Biotechnology and Animal Husbandry, West Pomeranian University of Technology, Klemensa Janickiego 29, 71-270 Szczecin, Poland

2. Rafał Rakoczy, Email: [rrakoczy@zut.edu.pl](mailto:rrakoczy@zut.edu.pl)

Institute of Chemical Engineering and Environmental Protection Process, West Pomeranian University of Technology, Szczecin, Piastow Avenue 42, 71-065 Szczecin, Poland

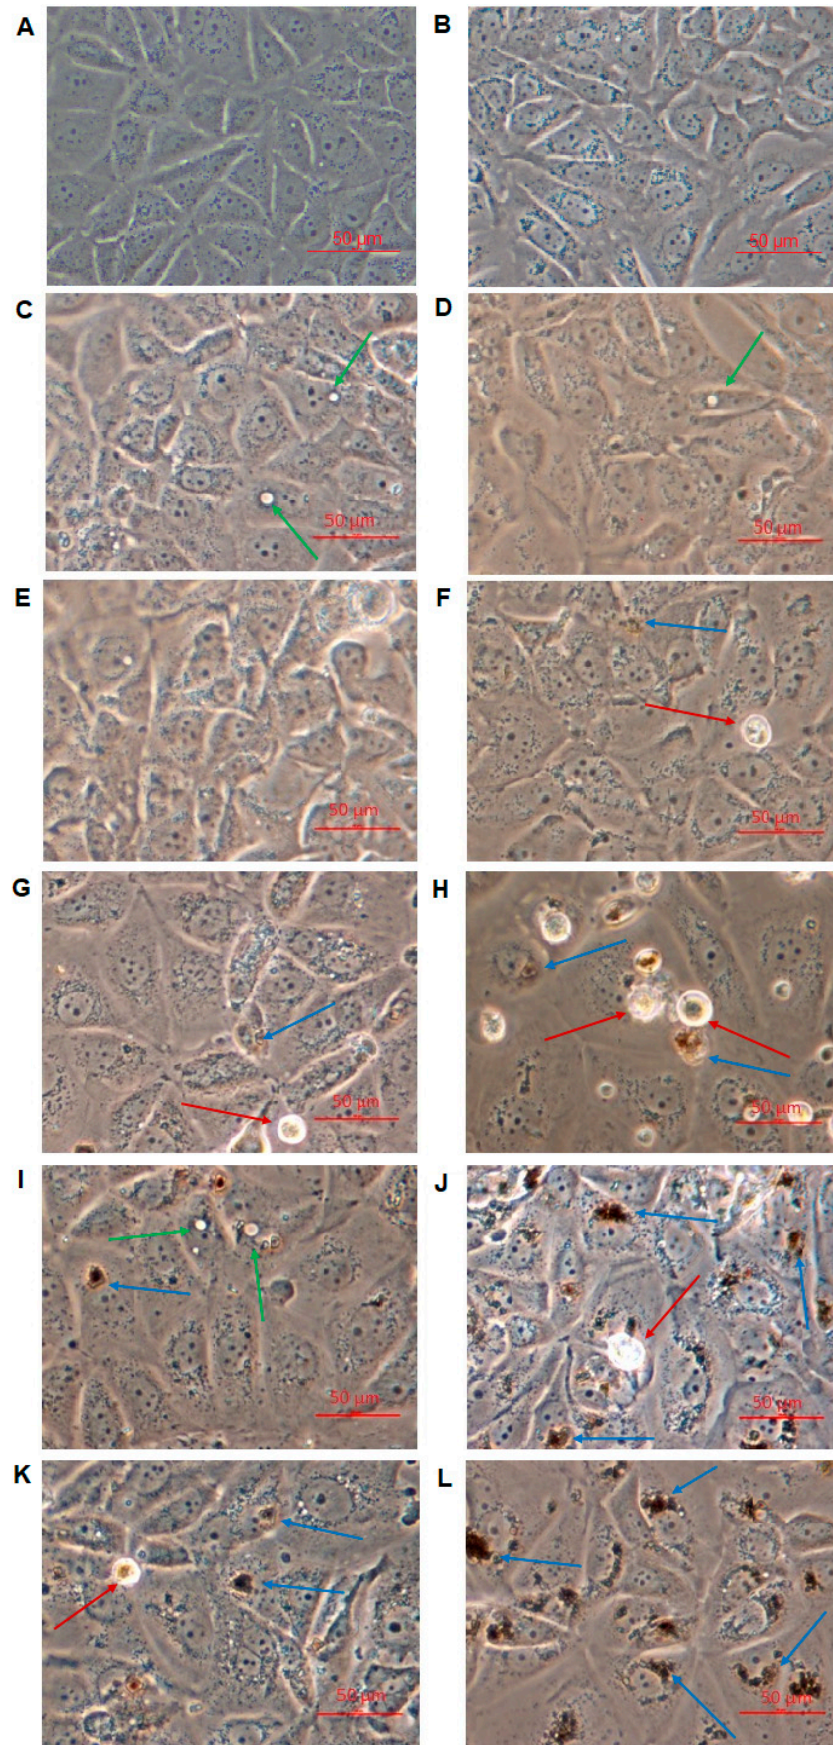

**Figure S1.** MCF-7 cell line morphology after 8 hours incubation in rotating magnetic field in (a-b) control culture; (c) cultures incubated with c-GO-Fe<sub>3</sub>O<sub>4</sub>-HCPT and (d) with nc-GO-Fe<sub>3</sub>O<sub>4</sub>-HCPT at concentration 3.125 µg·ml<sup>-1</sup>; (e) MCF-7 cells exposed to c-GO-Fe<sub>3</sub>O<sub>4</sub>-HCPT and (f) to nc-GO-Fe<sub>3</sub>O<sub>4</sub>-

HCPT at concentration  $6.25 \mu\text{g}\cdot\text{ml}^{-1}$ ; (g) MCF-7 cultures incubated with c-GO-Fe<sub>3</sub>O<sub>4</sub>-HCPT and (h) with nc-GO-Fe<sub>3</sub>O<sub>4</sub>-HCPT at concentration  $12.5 \mu\text{g}\cdot\text{ml}^{-1}$ ; (i) cells exposed to c-GO-Fe<sub>3</sub>O<sub>4</sub>-HCPT and (j) to nc-GO-Fe<sub>3</sub>O<sub>4</sub>-HCPT at concentration  $25.0 \mu\text{g}\cdot\text{ml}^{-1}$ ; (k) cultures incubated with c-GO-Fe<sub>3</sub>O<sub>4</sub>-HCPT and (l) with nc-GO-Fe<sub>3</sub>O<sub>4</sub>-HCPT at concentration  $50.0 \mu\text{g}\cdot\text{ml}^{-1}$ .

Green arrows indicate vacuoles; blue arrows show shrunken cells; red arrows indicate nanomaterials accumulated within cells or aggregates.

1 **Table S1.** Statistically significant differences between means obtained from MCF-7 cell cultures incubated with graphene oxide-Fe<sub>3</sub>O<sub>4</sub> analyzed  
 2 using WST-1, LDH and NR assays (small letters present differences considered as significant at a level of p<0.05).

|                                   | Concentration (µg/mL) |     |                  |         |     |    |                  |     |    |         |      |    |         |     |    |         |     |    |
|-----------------------------------|-----------------------|-----|------------------|---------|-----|----|------------------|-----|----|---------|------|----|---------|-----|----|---------|-----|----|
|                                   | 0                     |     |                  | 3.125   |     |    | 6.25             |     |    | 12.5    |      |    | 25.0    |     |    | 50.0    |     |    |
|                                   | a                     |     |                  | b       |     |    | c                |     |    | d       |      |    | e       |     |    | f       |     |    |
|                                   | WST-1                 | LDH | NR               | WST-1   | LDH | NR | WST-1            | LDH | NR | WST-1   | LDH  | NR | WST-1   | LDH | NR | WST-1   | LDH | NR |
| GO-Fe <sub>3</sub> O <sub>4</sub> | c                     | d   | b, c, d,<br>e, f | c, e, f | d   | a  | a, b, d, e,<br>f | -   | a  | c, e, f | a, b | a  | b, c, d | -   | a  | b, c, d | -   | a  |

4

5 **Table S2.** Statistically significant differences between means obtained from MCF-7 cell cultures incubated with different concentration of  
6 hydroxycamptothecin analyzed using WST-1, LDH and NR assays (small letters present differences considered as significant at a level of  $p < 0.05$ ).

|      | Concentration ( $\mu\text{g/mL}$ ) |                     |                     |                     |                     |                     |       |      |         |       |      |                  |       |      |         |       |      |         |       |      |         |
|------|------------------------------------|---------------------|---------------------|---------------------|---------------------|---------------------|-------|------|---------|-------|------|------------------|-------|------|---------|-------|------|---------|-------|------|---------|
|      | 0                                  |                     |                     | DMSO                |                     |                     | 3.125 |      |         | 6.25  |      |                  | 12.5  |      |         | 25.0  |      |         | 50.0  |      |         |
|      | a                                  |                     |                     | b                   |                     |                     | c     |      |         | d     |      |                  | e     |      |         | f     |      |         | g     |      |         |
|      | WST-1                              | LDH                 | NR                  | WST-1               | LDH                 | NR                  | WST-1 | LDH  | NR      | WST-1 | LDH  | NR               | WST-1 | LDH  | NR      | WST-1 | LDH  | NR      | WST-1 | LDH  | NR      |
| HCPT | b, c, d,<br>e, f, g                | b, c, d,<br>e, f, g | b, c, d,<br>e, f, g | a, b  | a, b | a, b, d | a, b  | a, b | a, b, c,<br>f, g | a, b  | a, b | a, b, c | a, b  | a, b | a, b, d | a, b  | a, b | a, b, d |

7

8

9

10

11

12

**Table S3.** Statistically significant differences between means of MCF-7 cell controls and experimental samples exposed to different magnetic induction intensity of RMF obtained from WST-1, LDH and NR assays (small letters present differences considered as significant at a level of  $p<0.05$ ).

|                       | Magnetic induction (mT) |            |    |       |            |    |       |            |    |       |         |    |       |         |    |       |            |    |            |                  |                  |
|-----------------------|-------------------------|------------|----|-------|------------|----|-------|------------|----|-------|---------|----|-------|---------|----|-------|------------|----|------------|------------------|------------------|
|                       | 0 (without RMF)         |            |    | 1.23  |            |    | 1.57  |            |    | 2.36  |         |    | 3.95  |         |    | 6.58  |            |    | 10.06      |                  |                  |
|                       | a                       |            |    | b     |            |    | c     |            |    | d     |         |    | e     |         |    | f     |            |    | g          |                  |                  |
|                       | WST-1                   | LDH        | NR | WST-1 | LDH        | NR | WST-1 | LDH        | NR | WST-1 | LDH     | NR | WST-1 | LDH     | NR | WST-1 | LDH        | NR | WST-1      | LDH              | NR               |
| 8 h exposition        | e, f, g                 | b, c, d, g | a  | f, g  | a, e, f, g | a  | g     | a, e, f, g | a  | g     | a, f, g | a  | a     | b, c, g | a  | a, b  | b, c, d, g | a  | a, b, c, d | a, b, c, d, e, f | a, b, c, d, e, f |
| 24 h after exposition | e, f, g                 | g          | a  | -     | g          | a  | -     | g          | a  | -     | g       | a  | a     | g       | a  | a     | g          | a  | a          | a, b, c, d, e, f | a, b, c, d, e, f |

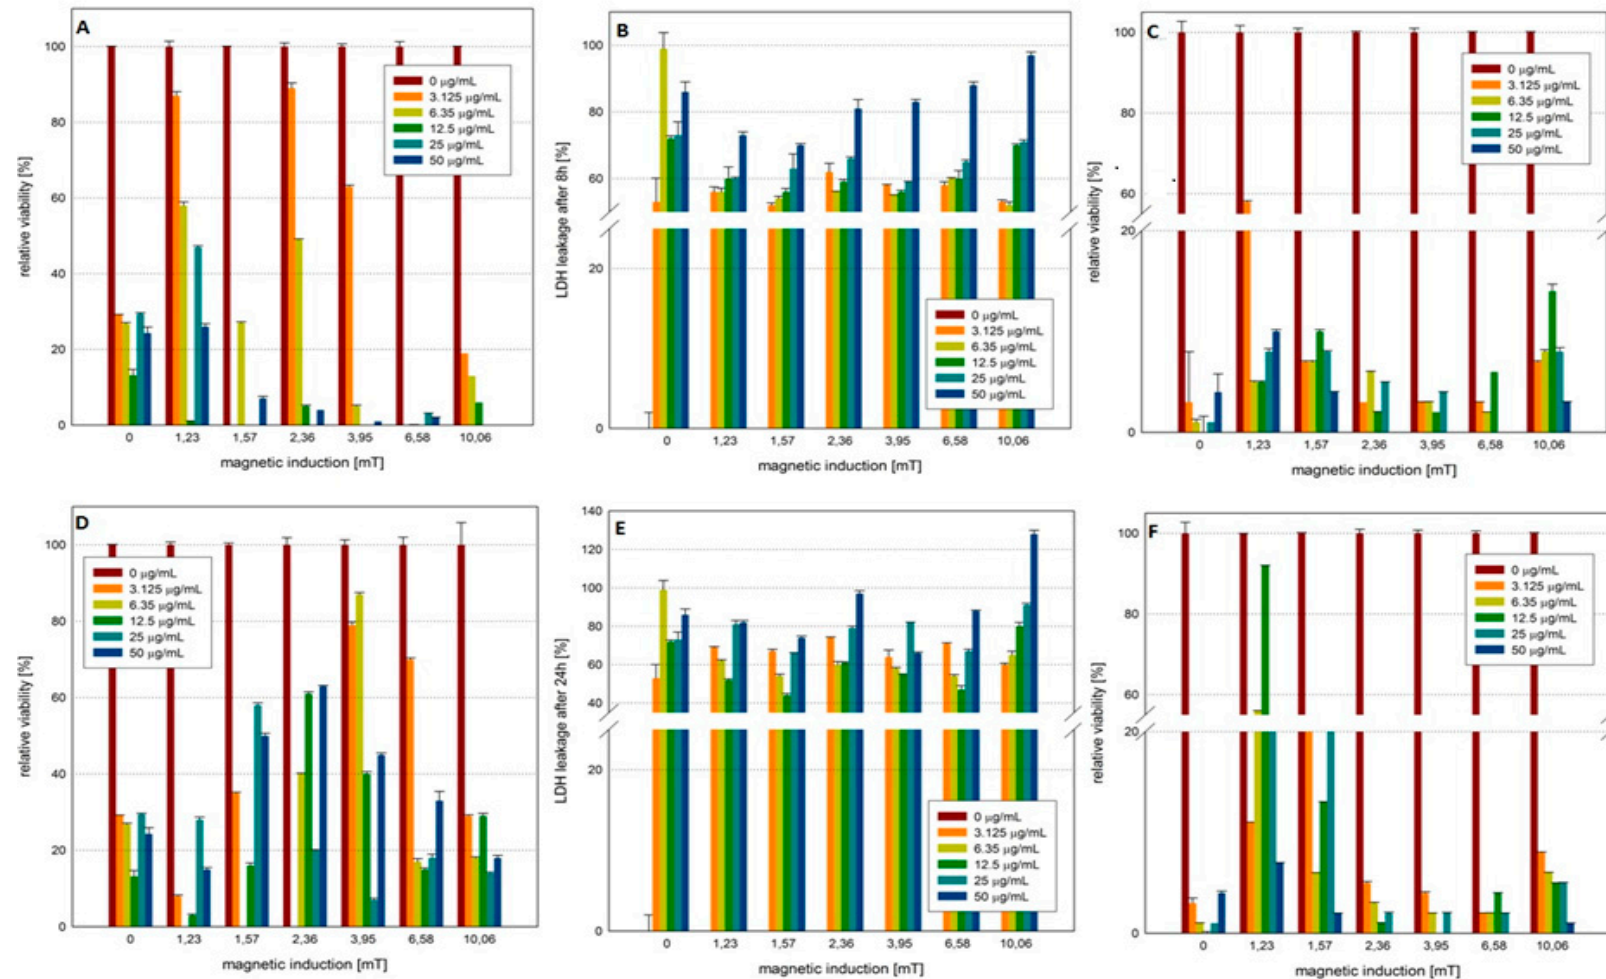

23  
 24 **Figure S2.** The response of MCF-7 cells to c-GO-Fe<sub>3</sub>O<sub>4</sub>-HCPT nanomaterial and RMF; (a) relative viability (WST-1 assay results); (b) LDH  
 25 membrane leakage (LDH assay results); (c) neutral red uptake (NR assay results); (d) relative viability 24-hour after RMF exposure (WST-1 assay);  
 26 (e) LDH release 24-hour after RMF exposure (LDH assay); (f) NR uptake 24-hour after RMF exposure (p-values<0.05 are considered significant  
 27 and are represented by small letters, Table S4).

28

29 **Table S4.** Statistically significant differences between means of MCF-7 cell controls and experimental samples exposed to different magnetic  
 30 induction intensity of RMF obtained from WST-1, LDH and NR assays (small letters present differences considered as significant at a level of  
 31  $p < 0.05$ ).

| Type of nanomaterial                              | Magnetic induction (mT) |                  |                  |                  |      |               |                  |            |               |            |      |                  |            |      |                  |                  |            |               |                  |                  |            |
|---------------------------------------------------|-------------------------|------------------|------------------|------------------|------|---------------|------------------|------------|---------------|------------|------|------------------|------------|------|------------------|------------------|------------|---------------|------------------|------------------|------------|
|                                                   | 0 (without RMF)         |                  |                  | 1.23             |      |               | 1.57             |            |               | 2.36       |      |                  | 3.95       |      |                  | 6.58             |            |               | 10.06            |                  |            |
|                                                   | a                       |                  |                  | b                |      |               | c                |            |               | d          |      |                  | e          |      |                  | f                |            |               | g                |                  |            |
|                                                   | WST-1                   | LDH              | NR               | WST-1            | LDH  | NR            | WST-1            | LDH        | NR            | WST-1      | LDH  | NR               | WST-1      | LDH  | NR               | WST-1            | LDH        | NR            | WST-1            | LDH              | NR         |
| c-GO-Fe <sub>3</sub> O <sub>4</sub> -CPT<br>8 h   | c, d, f, g              | b, c, d, e, f, g | b, c, d, e, f, g | c, d, e, f, g    | a    | a             | a, b, d, e, f, g | a          | a             | a, b, c, g | a    | a                | b, c, g    | a    | a                | a, b, c, g       | a          | a             | a, b, c, d, e, f | a                | a          |
| c-GO-Fe <sub>3</sub> O <sub>4</sub> -CPT<br>24 h  | c, f, g                 | b, c, d, e, f, g | b, c, d, e, f    | c, f, g          | a, g | a, d, e, f, g | a, b, d, e, f, g | a, g       | a, d, e, f, g | c, f, g    | a, g | a, b, c, e, f, g | c, f, g    | a, g | a, b, c, e, f, g | a, b, c, d, e, g | a, g       | a, b, c, d, e | a, b, c, d, e, f | a, b, c, d, e, f | b, c, d, e |
| nc-GO-Fe <sub>3</sub> O <sub>4</sub> -CPT<br>8 h  | b, c, d, e, f, g        | b, c, d, e, f, g | b, c, d, e, f, g | a, c, d, e, f, g | a    | a             | a, b, f, g       | a          | a             | a, b, f, g | a    | a                | a, b, f, g | a    | a                | a, b, c, d, e, g | a          | a             | a, b, c, d, e, f | a                | a          |
| nc-GO-Fe <sub>3</sub> O <sub>4</sub> -CPT<br>24 h | b, c, d, e, f, g        | b, c, d, e, f, g | d, e, f, g       | a, g             | a    | d, e, f, g    | a, g             | a, d, e, f | d, e, f, g    | a, g       | a, c | a, b, c, e       | a, g       | a, c | a, b, c, d, f    | a, g             | a, b, c, e | a, c          | a, b, c, d, e, f | a                | a, b, c    |

32

33

34

35



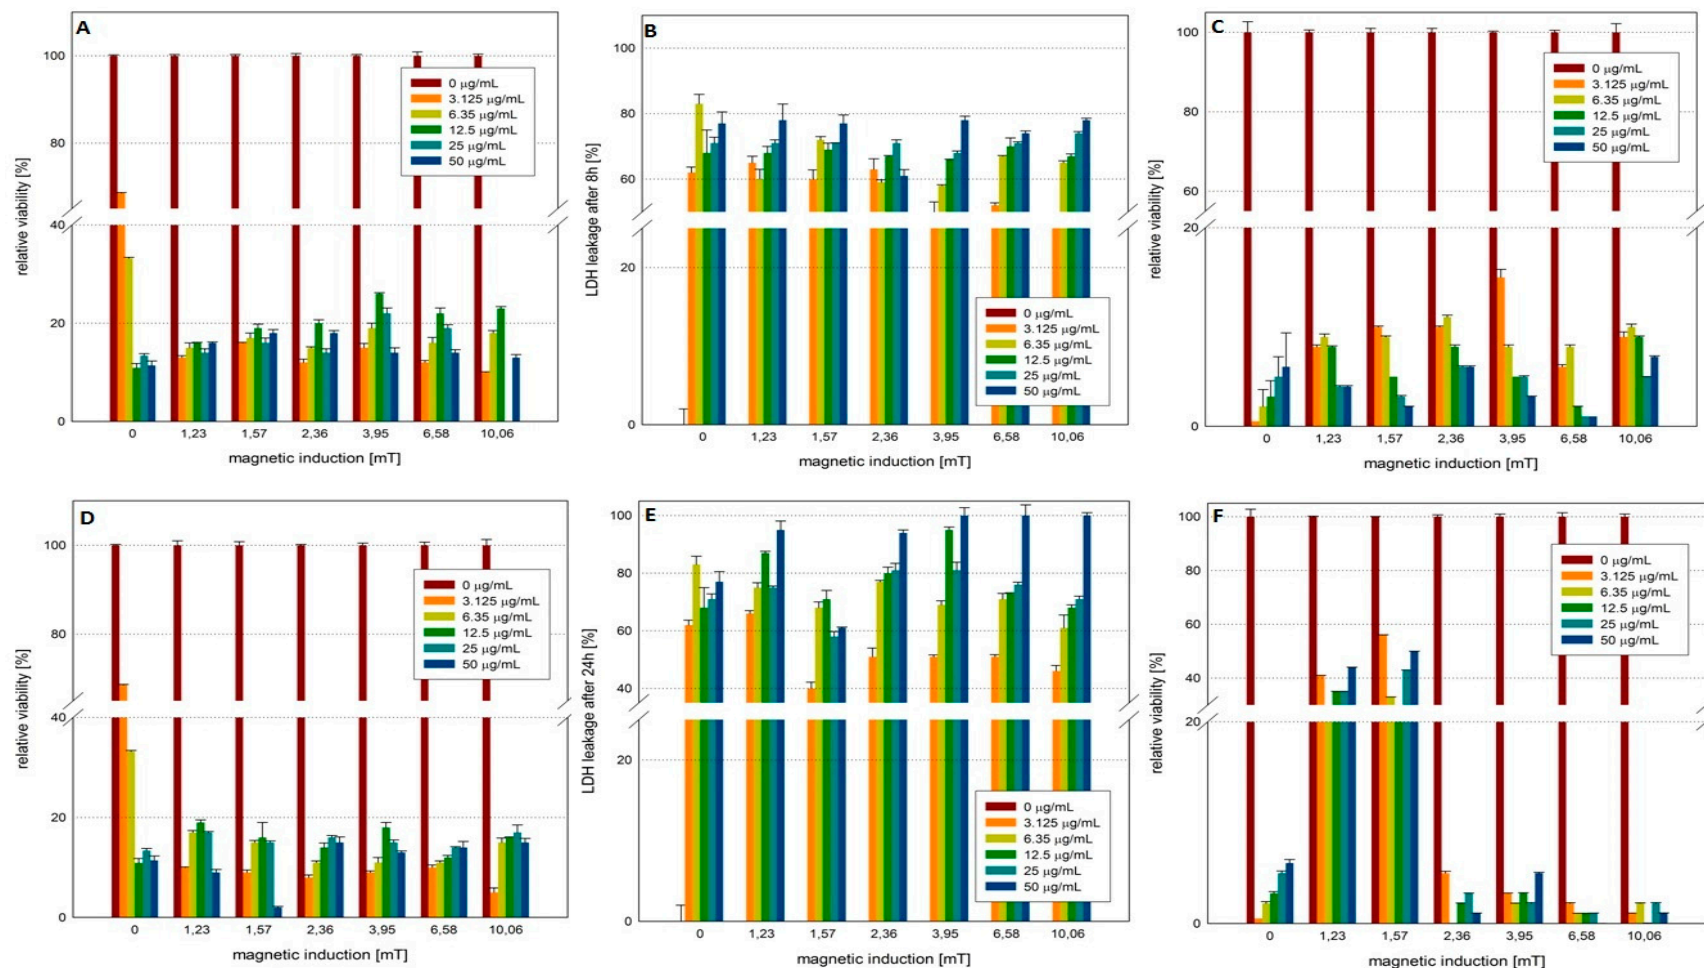

36  
 37 **Figure S3.** The response of MCF-7 to nc-GO-Fe<sub>3</sub>O<sub>4</sub>-HCPT nanomaterial and RMF; (a) relative viability (WST-1 assay results); (b) LDH membrane  
 38 leakage (LDH assay results); (c) neutral red uptake (NR assay results); (d) relative viability 24-hour after RMF exposure (WST-1 assay results); (e)  
 39 LDH release 24-hour after RMF exposure (LDH assay results); (f) NR uptake assay 24-hour after RMF exposure (p-values<0.05 are considered  
 40 significant and are represented by small letters, Table S5).

**Table S5.** Statistically significant differences between means of MCF-7 cell controls and experimental samples exposed to different magnetic induction intensity of RMF obtained from WST-1, LDH and NR assays (small letters present differences considered as significant at a level of  $p < 0.05$ ).

| Type of nanomaterial                              | NPs concentration ( $\mu\text{g/mL}$ ) |               |               |               |               |      |            |         |    |            |            |    |            |            |      |            |               |      |
|---------------------------------------------------|----------------------------------------|---------------|---------------|---------------|---------------|------|------------|---------|----|------------|------------|----|------------|------------|------|------------|---------------|------|
|                                                   | 0 (without NPs)                        |               |               | 3.125         |               |      | 6.25       |         |    | 12.5       |            |    | 25.0       |            |      | 50.0       |               |      |
|                                                   | a                                      |               |               | b             |               |      | c          |         |    | d          |            |    | e          |            |      | f          |               |      |
|                                                   | WST-1                                  | LDH           | NR            | WST-1         | LDH           | NR   | WST-1      | LDH     | NR | WST-1      | LDH        | NR | WST-1      | LDH        | NR   | WST-1      | LDH           | NR   |
| c-GO-Fe <sub>3</sub> O <sub>4</sub> -CPT<br>8 h   | b, c, d, e, f                          | b, c, d, e, f | b, c, d, e, f | a, c, d, e, f | a, f          | a    | a, b, d, e | a, f    | a  | a, b, c, f | a, f       | a  | a, b, c, f | a          | a, f | a, b, d, e | a, b, c, d, e | a    |
| c-GO-Fe <sub>3</sub> O <sub>4</sub> -CPT<br>24 h  | b, c, d, e, f                          | b, c, d, e, f | b, c, d, e, f | a, c, d, e, f | a, d, f       | a, f | a, b, e    | a, b, f | a  | a, b, f    | a, b, e, f | a  | a, b, c, f | a, c, d, f | a    | a, b, d, e | a, b, c, d, e | a, b |
| nc-GO-Fe <sub>3</sub> O <sub>4</sub> -CPT<br>8 h  | b, c, d, e, f                          | b, c, d, e, f | b, c, d, e, f | a, c, d       | a, d, e, f    | a    | a, b, e, f | a       | a  | a, b, e, f | a, b       | a  | a, c, d    | a, b       | a    | a, c, d    | a, b          | a    |
| nc-GO-Fe <sub>3</sub> O <sub>4</sub> -CPT<br>24 h | b, c, d, e, f                          | b, c, d, e, f | b, c, d, e, f | a, c, d, e    | a, c, d, e, f | a    | a, b, f    | a, b, f | a  | a, b, f    | a, b, f    | a  | a, b, f    | a, b, f    | a    | a, c, d, e | a, b, c, d, e | a    |
